# Supplementary material for: Dimerization of heavy atom free tetraphenylethylene with aggregation induced emission for boosting photodynamic therapy
Source: Royal Society of Chemistry journal article supplement (doi:10.1039/d0nj01251c), 2020-01-01
Supplement: d0nj01251c1.pdf [file d0nj01251c1.pdf]

## Supporting information

### Dimerization of heavy atom free tetraphenylethylene with aggregation induced emission for boosting photodynamic therapy

Jianjiao Chen<sup>†a</sup>, Zhenyuan Zou<sup>†a</sup>, Zhen Ke<sup>a</sup>, Xujing Zhang<sup>a</sup>, Jingfei Feng<sup>a</sup>, Jing Yi<sup>a</sup>, Long Peng<sup>a</sup>, Jie Yang<sup>\*b</sup>, Yansong Dai<sup>\*c</sup>, Dengfeng Zou<sup>\*a</sup>

a. School of Pharmacy, Guilin Medical University, Guilin 541004, Guangxi, P.R.

China, Email: [zdf1226@126.com](mailto:zdf1226@126.com) Tel: +86-18907732411, Fax: +86-512-52251842

b. Department of Materials Engineering, Changshu Institute of Technology, 215500, Changshu, Jiangsu, China. [jieryang@cslg.edu.cn](mailto:jieryang@cslg.edu.cn)

c. Virginia University of Integrative Medicine, Fairfax, 22031, Virginia, USA.  
Email: [daiyansong@gmail.com](mailto:daiyansong@gmail.com)

<sup>†</sup>: These authors contribute equally

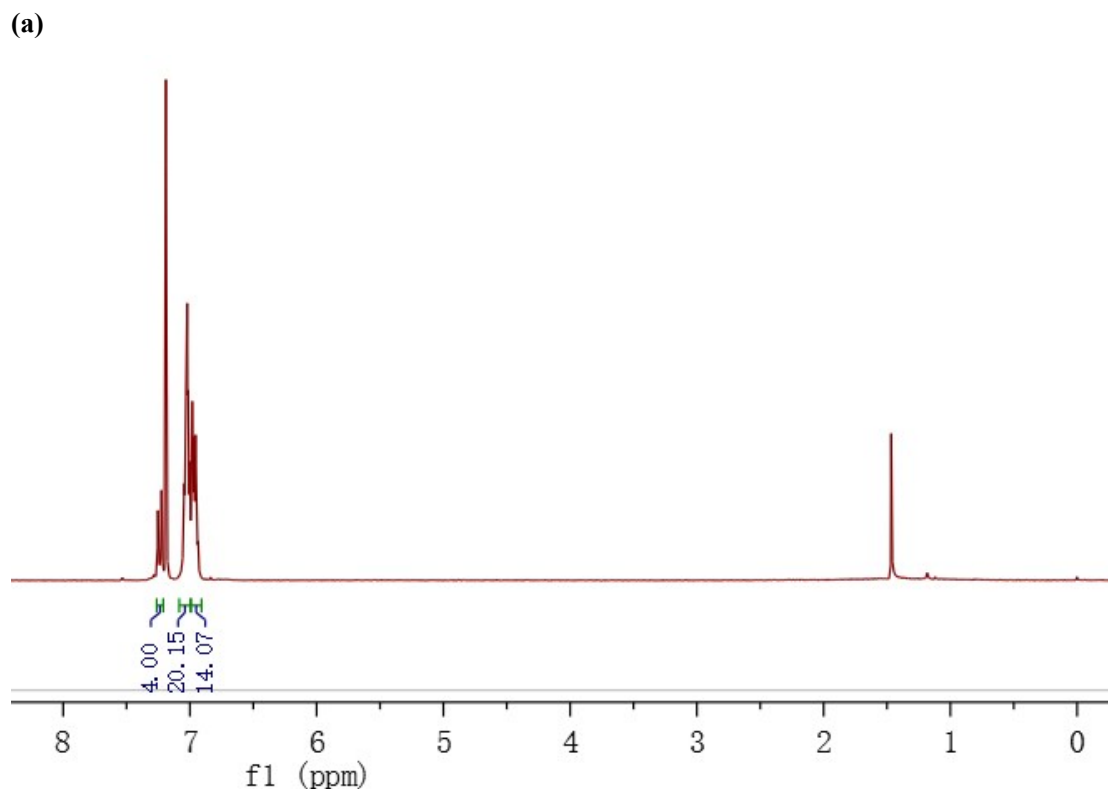

(b)

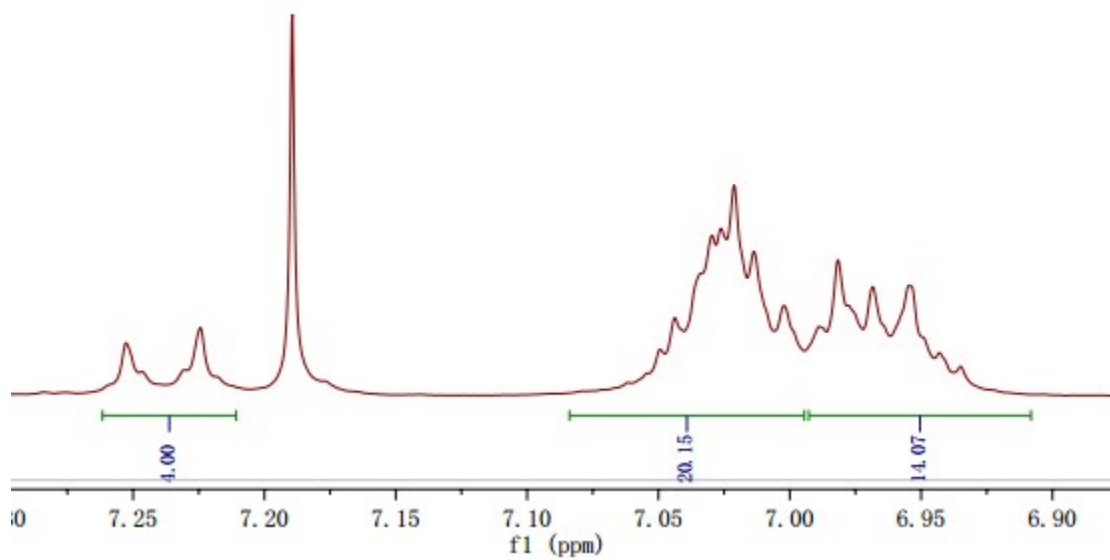

Figure S1 <sup>1</sup>H NMR spectrum of **BTPE** in CDCl<sub>3</sub>

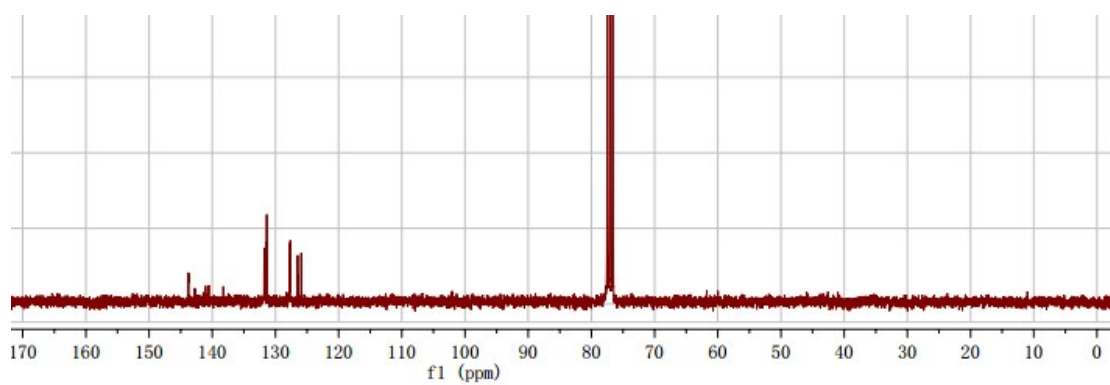

Figure S2 <sup>13</sup>C NMR spectrum of **BTPE** in CDCl<sub>3</sub>

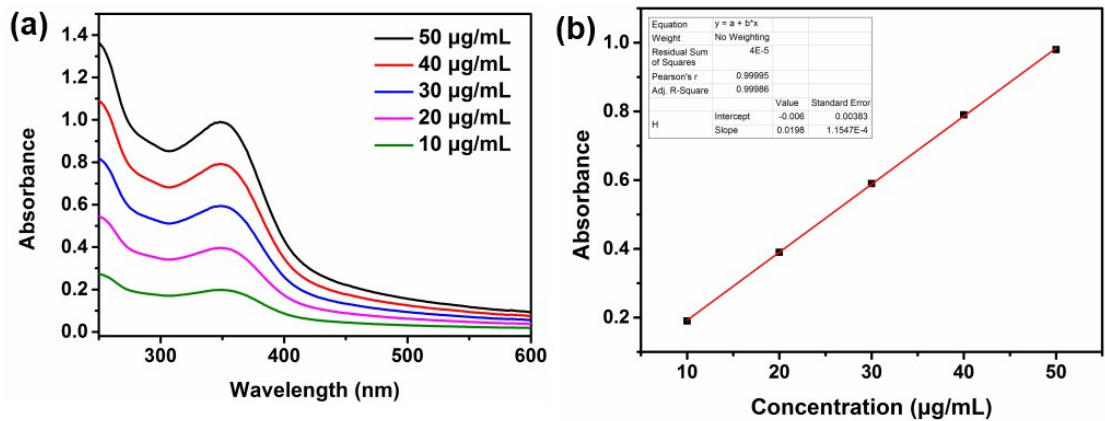

Figure S3 (a) Absorbance spectra of **BTPE** NPs in water with different concentrations; (b) Linear fitting of the absorbance.

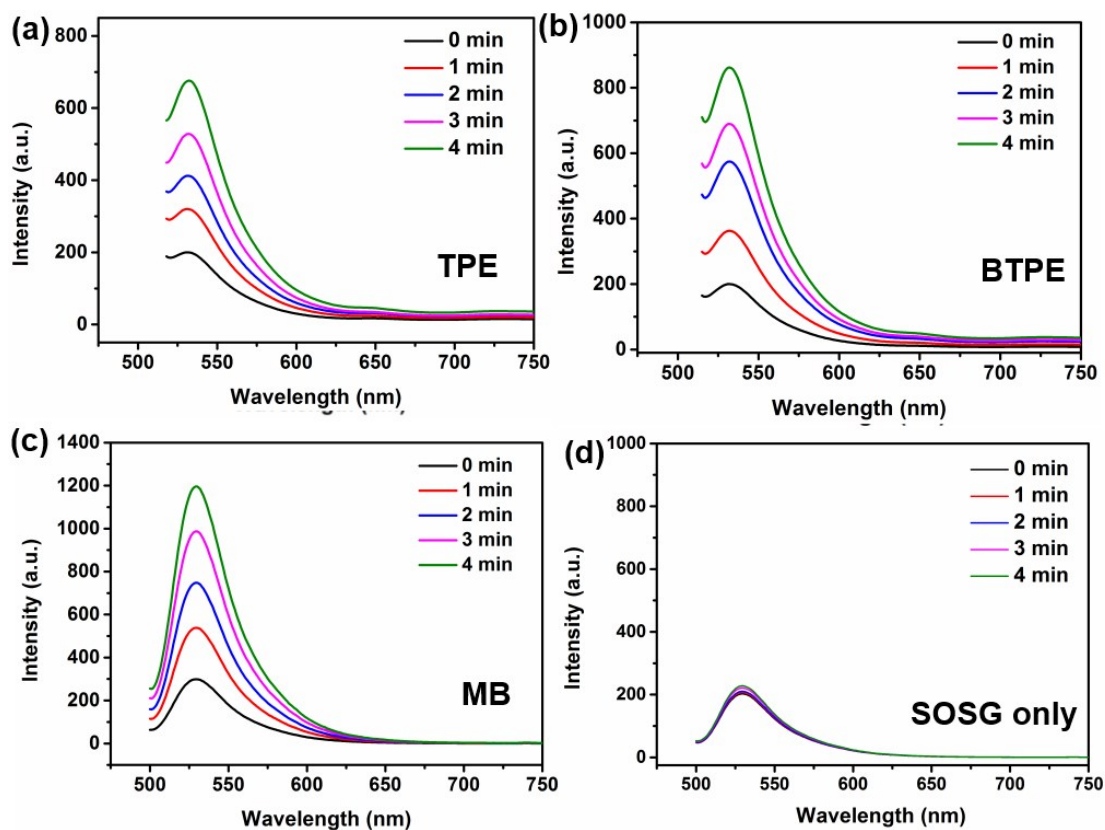

Figure S4 Fluorescence enhancement of SOSG in the presence of (a) **TPE** NPs; (b) **BTPE** NPs; (c) **MB** and (d) none with irradiation.

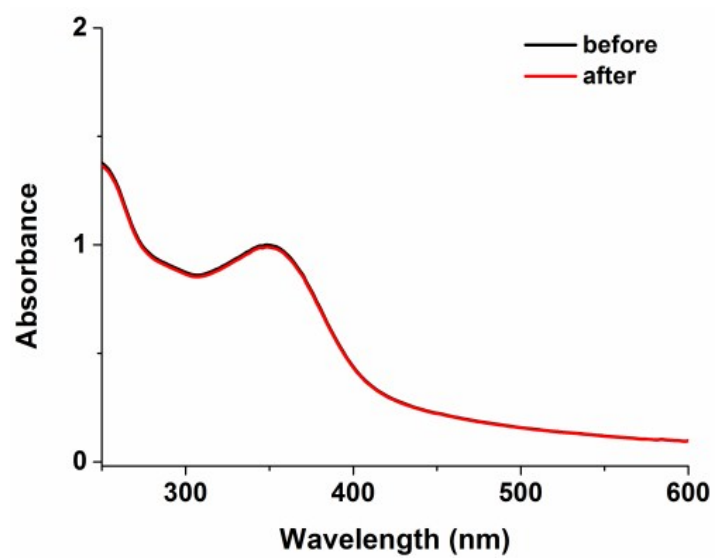

Figure S5 Absorbance spectra of **BTPE** NPs before and after irradiation.
